# Supplementary material for: Formic acid–hydrogen peroxide treatment of furfural residue for production of nanocellulose, lignin, and nano-scale lignin
Source: Royal Society of Chemistry journal article supplement (doi:10.1039/d2gc01211a), 2022-01-01
Supplement: d2gc01211a1.pdf [file d2gc01211a1.pdf]

**Formic acid-hydrogen peroxide treatment of furfural residue for production of nanocellulose, lignin, and nano-scale lignin**

Minmin Chang<sup>a,+</sup>, Xiaohui Wang<sup>a,b,+</sup>, Qixuan Lin<sup>a</sup>, Rui Li<sup>a</sup>, Lihong Zhao<sup>a</sup>, Junli Ren<sup>a,\*</sup>, Fengshan Zhang<sup>c</sup>

<sup>a</sup> State Key Laboratory of Pulp and Paper Engineering, School of Light Industry and Engineering, South China University of Technology, Guangzhou 510640, China.

<sup>b</sup> State Key Laboratory of Biobased Material and Green Papermaking, Qilu University of Technology, Jinan 250353, China.

<sup>c</sup> Shandong Huatai Paper Company limited, Dongying 257335, China.

+ These authors contributed equally to this work.

**Corresponding Author:**

Junli Ren: [renjunli@scut.edu.cn](mailto:renjunli@scut.edu.cn); Telephone: +8620-8711186

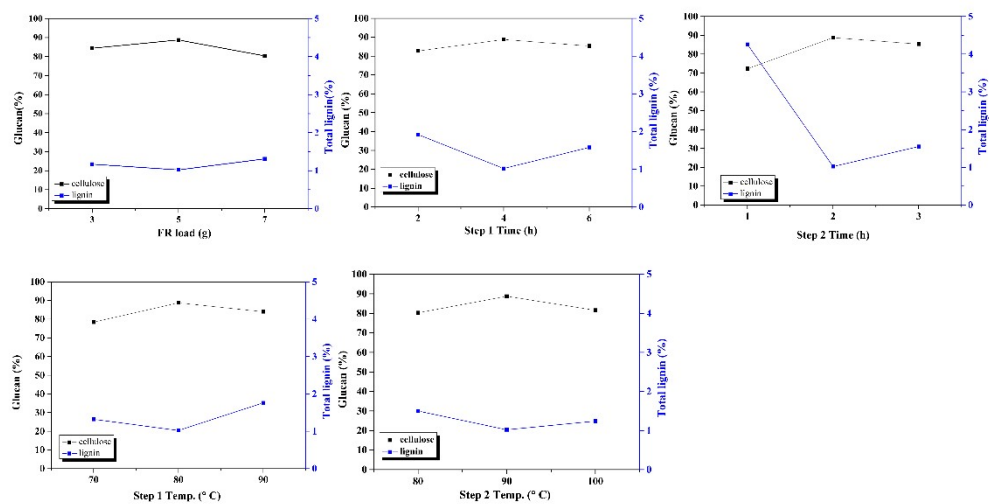

Figure S1. Cellulose content and residual lignin of solid residue under different conditions (Temp., Time and FR load).

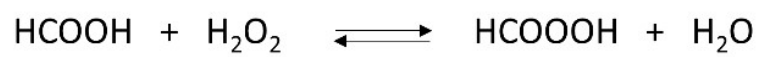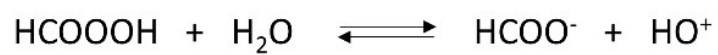

Figure S2. The reaction between formic acid and hydrogen peroxide.

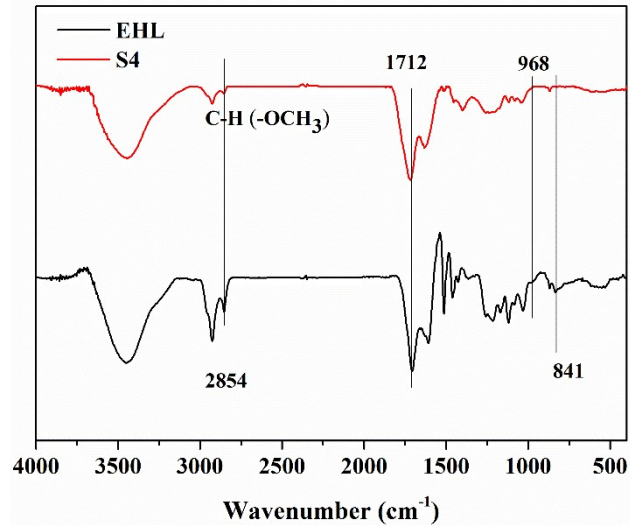

Figure S3. FTIR spectra of EHL extracted from furfural residue and recovery lignin (S4).

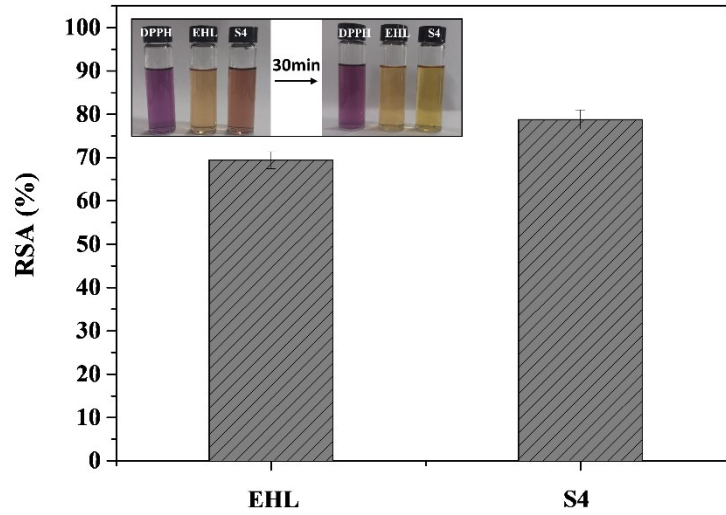

Figure S4. DPPH radical scavenging ability (RSA) of EHL and S4 lignin.

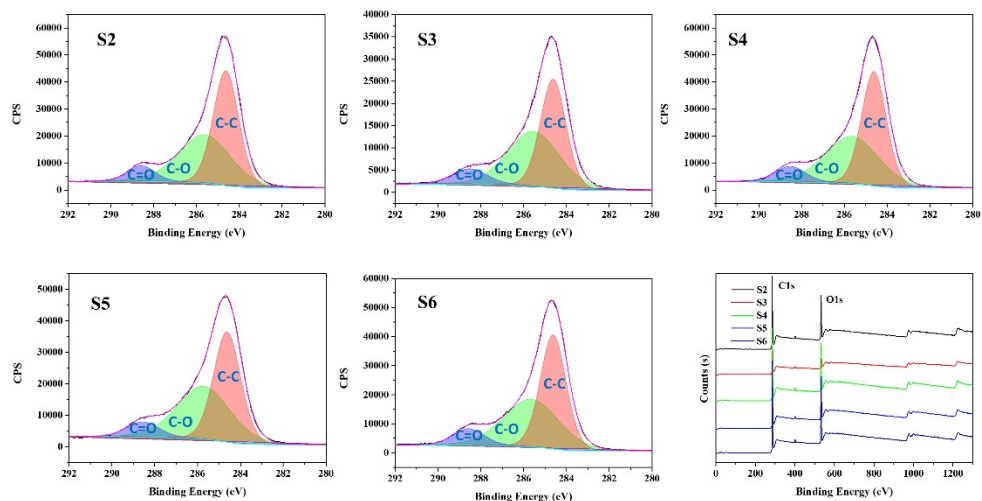

Figure S5. High-resolution C 1s spectra of nanoscale lignin (S2~S6).

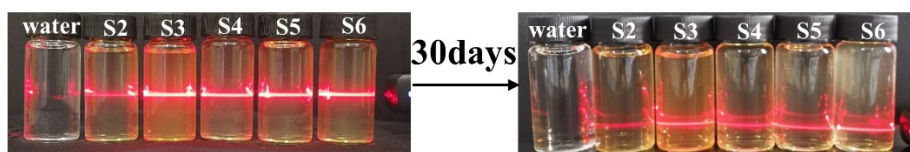

Figure S6. Stability of nano-scale lignin dispersion.

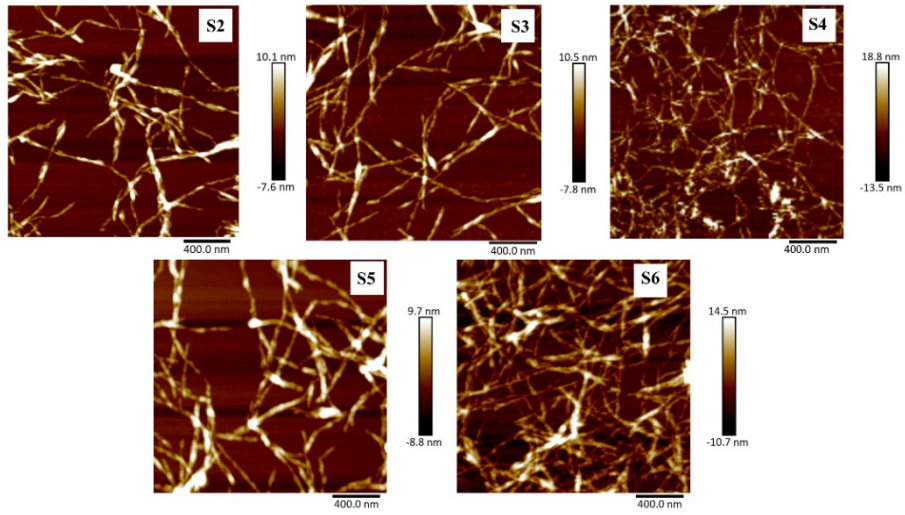

Figure S7. AFM images of nanocellulose with a concentration of 0.5 wt% (S2~S6).

**Table S1.** Component analysis of solid residue after treatment by different conditions.

| Samples | Glucan | Insoluble lignin | Soluble lignin | Ash   | Total  |
|---------|--------|------------------|----------------|-------|--------|
| 1       | 29.6%  | 63.0%            | 1.12%          | 1.2%  | 94.92% |
| 2       | 79.41% | 1.32%            | 0.44%          | 5.36% | 86.53% |
| 3       | 88.73% | 0.80%            | 0.50%          | 6.93% | 97.17% |
| 4       | 84.00% | 1.76%            | 0.44%          | 6.05% | 92.26% |
| 5       | 81.30% | 1.50%            | 0.47%          | 4.52% | 87.80% |
| 6       | 82.61% | 1.24%            | 0.52%          | 3.75% | 88.12% |
| 7       | 82.71% | 1.92%            | 0.40%          | 7.25% | 92.29% |
| 8       | 85.36% | 1.58%            | 0.44%          | 6.28% | 93.66% |
| 9       | 81.29% | 4.26%            | 0.47%          | 3.69% | 88.71% |
| 10      | 80.34% | 1.55%            | 0.49%          | 4.43% | 86.80% |
| 11      | 85.38% | 1.17%            | 0.44%          | 7.07% | 94.06% |
| 12      | 81.34% | 1.31%            | 0.57%          | 5.15% | 88.37% |

**Table S2.** Treatment conditions for different reactions.

| Samples | FR-FA-H <sub>2</sub> O <sub>2</sub><br>(g-mL-mL) | Step1 Temp.<br>(°C) | Step2<br>Temp.<br>(°C) | Step1 time<br>(h) | Step2 time<br>(h) |
|---------|--------------------------------------------------|---------------------|------------------------|-------------------|-------------------|
| 1       | -                                                | -                   | -                      | -                 | -                 |
| 2       | 5-40-16                                          | 70                  | 90                     | 4                 | 2                 |
| 3       | 5-40-16                                          | 80                  | 90                     | 4                 | 2                 |
| 4       | 5-40-16                                          | 90                  | 90                     | 4                 | 2                 |
| 5       | 5-40-16                                          | 80                  | 80                     | 4                 | 2                 |
| 6       | 5-40-16                                          | 80                  | 100                    | 4                 | 2                 |
| 7       | 5-40-16                                          | 80                  | 90                     | 2                 | 2                 |
| 8       | 5-40-16                                          | 80                  | 90                     | 6                 | 2                 |
| 9       | 5-40-16                                          | 80                  | 90                     | 4                 | 1                 |
| 10      | 5-40-16                                          | 80                  | 90                     | 4                 | 3                 |
| 11      | 3-40-16                                          | 80                  | 90                     | 4                 | 2                 |
| 12      | 7-40-16                                          | 80                  | 90                     | 4                 | 2                 |

**Table S3.** Yields of precipitated lignin and nano-scale lignin (Based on theoretical lignin value of FR).

| Samples | Lignin yields | Nano-scale lignin yields | Total yields |
|---------|---------------|--------------------------|--------------|
|         | (%)           | (%)                      | (%)          |
| S2      | 37.14         | 6.55                     | 43.69        |
| S3      | 30.74         | 15.90                    | 46.63        |
| S4      | 28.04         | 11.89                    | 39.93        |
| S5      | 30.95         | 10.61                    | 41.56        |
| S6      | 24.59         | 9.33                     | 33.82        |

**Table S4.** Assignment of  $^{13}\text{C}/^1\text{H}$  correlation of signals in the 2D-NMR.

| Label                                                               | $\delta_{\text{C}}/\delta_{\text{H}}$ | Assignment                                                                                                             |
|---------------------------------------------------------------------|---------------------------------------|------------------------------------------------------------------------------------------------------------------------|
| <u>Lignin signals</u>                                               |                                       |                                                                                                                        |
| -OCH <sub>3</sub>                                                   | 55.6/3.73                             | C/H in methoxyls                                                                                                       |
| A <sub>v</sub>                                                      | 59.4/3.72                             | C <sub>v</sub> /H <sub>v</sub> in normal ( $\gamma$ -hydroxylated) $\beta$ -O-4' substructures (A)                     |
| A' <sub>v</sub>                                                     | 62.7/3.83-4.30                        | C <sub>v</sub> /H <sub>v</sub> in $\gamma$ -acylated $\beta$ -O-4' substructures (A')                                  |
| lv                                                                  | 60.54/4.53                            | C <sub>v</sub> -H <sub>v</sub> in spiridienone substructures (D)                                                       |
| A <sub><math>\beta</math>(s)</sub>                                  | 85.9/4.12                             | C <sub><math>\beta</math></sub> /H <sub><math>\beta</math></sub> in $\beta$ -O-4' substructures linked to a S unit (A) |
| S <sub>2,6</sub>                                                    | 103.8/6.69                            | C <sub>2</sub> /H <sub>2</sub> and C <sub>6</sub> /H <sub>6</sub> in etherified syringyl unites (S)                    |
| S' <sub>2,6</sub>                                                   | 106.4/7.19                            | C <sub>2</sub> /H <sub>2</sub> and C <sub>6</sub> /H <sub>6</sub> in $\alpha$ -oxidized syringyl unites (S')           |
| PCA <sub><math>\beta</math></sub> /FA <sub><math>\beta</math></sub> | 113.5/6.27                            | C <sub><math>\beta</math></sub> /H <sub><math>\beta</math></sub> in <i>p</i> -coumarates (PCA) and ferulates (FA)      |
| H <sub>3,5</sub>                                                    | 114.5/6.62                            | C <sub>3</sub> /H <sub>3</sub> and C <sub>5</sub> /H <sub>5</sub> in <i>p</i> -hydroxyphenyl units (H)                 |
| G <sub>6</sub>                                                      | 118.7/6.77                            | C <sub>6</sub> /H <sub>6</sub> in guaiacyl units (G)                                                                   |
| PCA <sub>3,5</sub>                                                  | 115.5/6.77                            | C <sub>3</sub> /H <sub>3</sub> and C <sub>5</sub> /H <sub>5</sub> in <i>p</i> -coumarates (PCA)                        |
| H <sub>2,6</sub>                                                    | 128.0/7.20                            | C <sub>2</sub> /H <sub>2</sub> and C <sub>6</sub> /H <sub>6</sub> in <i>p</i> -hydroxyphenyl units (H)                 |
| PCA <sub>2,6</sub>                                                  | 130.8/7.46                            | C <sub>2</sub> /H <sub>2</sub> and C <sub>6</sub> /H <sub>6</sub> in <i>p</i> -coumarates (PCA)                        |



|                                   |            |                                                                                                   |
|-----------------------------------|------------|---------------------------------------------------------------------------------------------------|
| P <sub>2,6</sub>                  | 131.5/7.91 | C <sub>2</sub> /H <sub>2</sub> and C <sub>6</sub> /H <sub>6</sub> in <i>p</i> -hydroxybenoate (P) |
| PCA <sub>α</sub> /FA <sub>α</sub> | 144.4/7.45 | C <sub>α</sub> /H <sub>α</sub> in <i>p</i> -coumarates (PCA) and ferulates (FA)                   |

Carbohydrate signals

|                       |                    |                                                                    |
|-----------------------|--------------------|--------------------------------------------------------------------|
| Gl <sub>6(I+R)</sub>  | 60.6/3.60 and 3.80 | C <sub>6</sub> /H <sub>6</sub> in (1→4)-β-D-glucopyranoside (I+R)  |
| Gl <sub>6(NR)</sub>   | 62.7/3.35 and 3.47 | C <sub>6</sub> /H <sub>6</sub> in β-D-glucopyranoside (NR)         |
| Gl <sub>4(NR)</sub>   | 70.1/3.02          | C <sub>4</sub> /H <sub>4</sub> in β-D-glucopyranoside (NR)         |
| Gl <sub>2(I)</sub>    | 73.2/3.05          | C <sub>2</sub> /H <sub>2</sub> in (1→4)-β-D-glucopyranoside (I)    |
| Gl <sub>3(I)</sub>    | 74.6/3.35          | C <sub>3</sub> /H <sub>3</sub> in (1→4)-β-D-glucopyranoside (I)    |
| Gl <sub>5(I)</sub>    | 76.4/3.15          | C <sub>5</sub> /H <sub>5</sub> in (1→4)-β-D-glucopyranoside (I)    |
| Gl <sub>4(I)</sub>    | 80.5/3.32          | C <sub>4</sub> /H <sub>4</sub> in (1→4)-β-D-glucopyranoside (I)    |
| αGl <sub>1(R)</sub>   | 92.1/4.92          | C <sub>1</sub> /H <sub>1</sub> in α-D-glucopyranoside (R)          |
| βGl <sub>1(R)</sub>   | 96.5/4.25          | C <sub>1</sub> /H <sub>1</sub> in β-D-glucopyranoside (R)          |
| Gl <sub>1(I+NR)</sub> | 102.6/4.31         | C <sub>1</sub> /H <sub>1</sub> in (1→4)-β-D-glucopyranoside (I+NR) |

---

Table S5. Pyrolysis products determined by PY-GC-MS from fast pyrolysis of EHL at 500 °C.

| Type | Relative amount (%) | Compounds                                   | Structure                                                                             |
|------|---------------------|---------------------------------------------|---------------------------------------------------------------------------------------|
| H    | 69.72%              | Mequinol                                    | 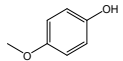   |
|      |                     | Butylated hydroxytoluene                    |    |
|      |                     | Phenol, 4,6-di(1,1-dimethylethyl)-2-methyl- |    |
|      |                     | Phenol, 4-ethyl-                            |    |
| G    | 27.73%              | Creosol                                     |  |
|      |                     | Phenol, 4-ethyl-2-methoxy-                  |  |
|      |                     | 2-Methoxy-4-vinylphenol                     |  |
| S    | 2.53%               | 3,5-Dimethoxy-4-hydroxytoluene              |  |

Table S6. Pyrolysis products determined by PY-GC-MS from fast pyrolysis of recovery lignin (S4) at 500 °C.

| Compounds                               | Structure                                                                            |
|-----------------------------------------|--------------------------------------------------------------------------------------|
| Styrene                                 |    |
| Phenol                                  |    |
| p-Cresol                                |    |
| Formic acid phenyl ester                |    |
| Benzeneethanol, 2-hydroxy-              |  |
| Benzaldehyde, 2-methyl-                 |  |
| Phenol, 2-(1,1-dimethylethyl)-5-methyl- |  |
| Butylated Hydroxytoluene                |  |

**Table S7.** Purity of recovered lignin (S4) determined by NREL method.

|    | Insoluble lignin | Soluble lignin | Cellulose | Purity |
|----|------------------|----------------|-----------|--------|
| S4 | 87.9%            | 1.8%           | 0.7%      | 89.7%  |

**Table S8.** The content of the C 1s peaks and O/C ratio.

|    | C-C (%)         | C-O (%)         | C=O (%)        | O/C (%) |
|----|-----------------|-----------------|----------------|---------|
| S2 | 284.60 (49.94%) | 285.61 (43.01%) | 288.56 (7.04%) | 0.273   |
| S3 | 284.60 (48.71%) | 285.52 (43.50%) | 288.50 (7.79%) | 0.277   |
| S4 | 284.60 (45.31%) | 285.62(46.29%)  | 288.52(8.20%)  | 0.291   |
| S5 | 284.60 (47.71%) | 285.71 (44.74%) | 288.54 (7.54%) | 0.286   |
| S6 | 284.60 (48.49%) | 285.63 (43.22%) | 288.55 (8.30%) | 0.298   |

**Table S9.** Yields of nanocellulose (based on theoretical value of cellulose in FR).

| Samples | Yields (%) |
|---------|------------|
| S2      | 52.3       |
| S3      | 27         |
| S4      | 27.1       |
| S5      | 27.3       |
| S6      | 26.4       |
